## Research Paper

# Noninvasive detection of tumor-associated mutations from circulating cell-free DNA in hepatocellular carcinoma patients by targeted deep sequencing

Wenjun Liao<sup>1</sup>, Huayu Yang<sup>1</sup>, Haifeng Xu<sup>1</sup>, Yanan Wang<sup>2</sup>, Penglei Ge<sup>1</sup>, Jinjun Ren<sup>1</sup>, Wei Xu<sup>1</sup>, Xin Lu<sup>1</sup>, Xinting Sang<sup>1</sup>, Shouxian Zhong<sup>1</sup>, Hongbing Zhang<sup>2</sup>, Yilei Mao<sup>1</sup>

<sup>1</sup>Department of Liver Surgery, Peking Union Medical College (PUMC) Hospital, PUMC & Chinese Academy of Medical Sciences, Beijing, China

<sup>2</sup>State Key Laboratory of Medical Molecular Biology, Department of Physiology, Collaborative Innovation Center for Cancer Medicine, Institute of Basic Medical Sciences and School of Basic Medicine, PUMC & Chinese Academy of Medical Sciences, Beijing, China

**Correspondence to:** Yilei Mao, [email: yileimao@126.com](mailto:yileimao@126.com)

**Keywords:** circulating cell-free DNA, circulating tumor DNA, hepatocellular carcinoma, tumor-associated mutation, MiSeq sequencing

**Received:** December 02, 2015

**Accepted:** May 02, 2016

**Published:** May 26, 2016

## ABSTRACT

**Background:** Detection of circulating cell-free DNA (cfDNA) has potential clinical value for assessing tumor biology in patients with hepatocellular carcinoma (HCC), yet many traditional assays lack robustness. This study was the first to apply a high-throughput sequencing platform to detect tumor-associated mutations in HCC from circulating tumor-derived DNA (ctDNA) and to evaluate the utility and feasibility of this approach.

**Methods:** Using the MiSeq™ system, plasma and matched tumor DNA samples were analyzed for hotspot mutations in the *TERT*, *CTNNB1*, and *TP53* genes that had been verified as the most prevalent mutations in HCC. We compared tumor and plasma data and prospectively investigated the association between significant mutations detected in ctDNA and the patients' clinical outcomes.

**Results:** In 41 patients, we detected tumor-associated mutations for HCC in 8 (19.5%) plasma samples. Among them, one showed a tumor-associated mutation in ctDNA but not in the tumor tissue which we used to detect. We also found that ctDNA with mutations could be detected more easily in patients who suffered vascular invasion ( $P=0.041$ ) and predicted a shorter recurrence-free survival time ( $P<0.001$ ). There was no relationship between detectable mutations and concentration of cfDNA ( $P=0.818$ ).

**Conclusions:** The results of our study suggest that tumor-associated mutations detected in plasma are associated with vascular invasion and might be used to predict a shorter recurrence-free survival time for HCC patients. This kind of biomarker can overcome the limitations of tumor heterogeneity. Moreover, the diagnostic performance is improved if multiple mutations in different genes are combined.

## INTRODUCTION

Circulating cell-free DNA (cfDNA) is a type of cell-free nucleic acid (cfNA) that is predominantly derived from apoptotic and necrotic cells but is also released by living eukaryotic cells [1, 2]. Evaluation of this naturally occurring biological material might have potential clinical

application for the detection and surveillance of major cancers because abnormal forms of tumor-derived cfDNA (ctDNA) are more likely to be present in these patients [1–3]. However, circulating cfDNA is present in only a few thousand amplifiable copies per milliliter of blood and typically contains fewer than 180 base pairs (bp), of which only 1% may be ctDNA and diagnostically relevant [4–6].

This places crucial limitations on the use of circulating cfDNA assays involving quantitative analyses, as well as most qualitative analyses.

The development of specialized techniques with high analytical sensitivity now allows reliable detection of tumor-specific genetic mutations present at frequencies as low as 0.01% [7, 8]. The application of this kind of digital genomic assay that allows discrimination of rare mutant variants in ctDNA has been reported in a wide range of cancers: for example, noninvasive detection of epidermal growth factor receptor (*EGFR*)-mutants in lung cancer [9] and phosphatidylinositol-4,5-bisphosphate 3-kinase, catalytic subunit alpha (*PIK3CA*)-mutants in breast cancer [10], and many other kinds of genetic-mutants in corresponding tumors. However, mutation detection in plasma DNA as a “liquid biopsy” has rarely been applied to hepatocellular carcinoma (HCC), even though it is the fifth most common cause of cancer in the world [11] and the mortality rate is rapidly increasing. Recent studies using whole-exome sequencing have revealed a global picture of the molecular genetics of HCC, and mutations in the telomerase reverse transcriptase (*TERT*), tumor protein p53 (*TP53*), and catenin beta 1 (*CTNNB1*) genes have emerged as the most prevalent alterations [12–14]. Therefore, targeting these specific frequent genetic aberrations in ctDNA might possibly be used to detect and assess HCC.

In the current study, we applied a high-throughput sequencing platform, Illumina MiSeq, for noninvasive detection of rare mutations in circulating cfDNA from plasma of HCC patients for the first time. We were interested in determining whether such an approach could be used to provide utility information for personalized medicine.

## RESULTS

### Patient characteristics

Between December 2013 and August 2014, a total of 41 patients with primary HCC were included in this study. All patients agreed to undergo a cfDNA assay on plasma obtained before surgery. The clinical characteristics of study patients are presented in Table 1. We also displayed the detailed information about the prior-treatment status of 41 cancer patients in Supplementary Table 1. In addition, 10 volunteers without HCC consented to participate in this study as a control group and donated peripheral blood after the informed consent was signed. Among these, four were healthy volunteers and the other six had been diagnosed with hepatic hemangioma, hepatic cystic echinococcosis, focal nodular hyperplasia, epithelioid hemangioendothelioma, and intrahepatic cholangiocellular carcinoma, respectively. None of the control subjects

had chronic hepatitis or cirrhosis. The somatic mutation status that was detected in these volunteers is presented in Supplementary Table 2.

### Mutation analysis of circulating cell-free DNA and matched primary tumor DNA

The relevant mutation sites that we designed were detected in DNA samples from plasma and matched tumor tissue. The sequence depth of the targeted regions is shown in Figure 1. We detected and captured ctDNA with HCC-associated mutations in eight patients (19.5%). Among these, genetic mutations were detected in plasma samples of two patients (4.9%) for the *TERT* genetic mutation, four (9.8%) patients for *CTNNB1* mutation, and two (4.9%) patients for the *TP53* mutation. Interestingly, one patient (HCC32) had a tumor-associated mutation of HCC (c.122C>T, *CTNNB1*) in plasma DNA but not in the primary tumor DNA. This is because ctDNA fragments are collected from all tumors in a patient’s body and could therefore overcome the limitation of tumor heterogeneity that limits traditional tissue biopsy. We also performed the same analysis in the control group and found that only one plasma sample had the corresponding *TERT* mutation. The specificity of this analysis was 90%. Detailed results are presented in Supplementary Tables 2 and 3.

Furthermore, we randomly selected five patient plasma samples and performed repeated trials. The sequence depth of the targeted regions increased but the results were the same (Supplementary Table 4). We also used Sanger sequencing to detect these putative somatic mutations in genomic DNA of these 41 patients, with negative results in all cases (data not shown). Therefore, the somatic genetic alterations that we selected for analysis were specific for HCC.

### Correlation between detectable somatic mutations in plasma and clinicopathologic characteristics

We analyzed whether there was a relationship between somatic mutation status in plasma and the patients’ clinicopathologic characteristics and found that corresponding somatic mutations in plasma DNA correlated with vascular invasion. Specifically, there was a significantly higher probability of capturing and detecting ctDNA with tumor-associated mutation status when the HCC patient suffered vascular invasion ( $P=0.041$  for plasma DNA; Table 1). Other parameters, such as cirrhosis, and tumor size, did not significantly affect the detection rate of ctDNA. Similarly, we also found that the mutation status in primary tumor DNA did not correlate with patient age or other clinicopathologic characteristics. The results of these analyses are shown in Table 1.

## Correlation between detectable somatic mutation in plasma and survival

We also investigated whether the status of tumor-associated somatic mutation in plasma could be used to predict clinical outcome in the patients with HCC who received surgical treatment. The follow-up time was from the date of operation until the date of tumor recurrence, or for up to 600 days. The data were adjusted from 41 to 40 because one of the patients (HCC01) without corresponding mutations present in plasma DNA was lost to follow-up. The median recurrence-free survival time for patients with tumor-associated somatic mutations detected in plasma DNA was 89 days (range, 34 to 299 days), compared with 365 days (range, 36 to 600 days) for patients with no mutation in plasma. Our data revealed that patients with detectable tumor-associated mutations in circulating cfDNA were more likely to relapse than those in whom the corresponding sequence alteration was undetectable ( $P < 0.001$ , log-rank test, Figure 2A). Similar results were obtained when we stratified the data

by mutation status just in patients who suffered vascular invasion ( $P = 0.003$ , log-rank test, Figure 2B). In addition, 14 patients were not suffered tumor recurrence in the follow-up period, and all of them had negative ctDNA analyses. So, the specificity of prognosis in our study is 100%.

## Correlation between detectable somatic mutation and concentration of circulating cfDNA

We also analyzed the relationship between tumor-associated mutations present in plasma and the concentration of circulating cfDNA. We found that the median concentration of circulating cfDNA in patients with tumor-associated mutation status in plasma was 7.501 ng/ml (range, 6.973 to 9.293 ng/ml), compared with 7.540 ng/ml (range, 6.810 to 15.205 ng/ml) for patients with no tumor-associated mutation detected. There was no significant difference between the two groups ( $Z = -0.230$ ,  $P = 0.818$ , Figure 3).

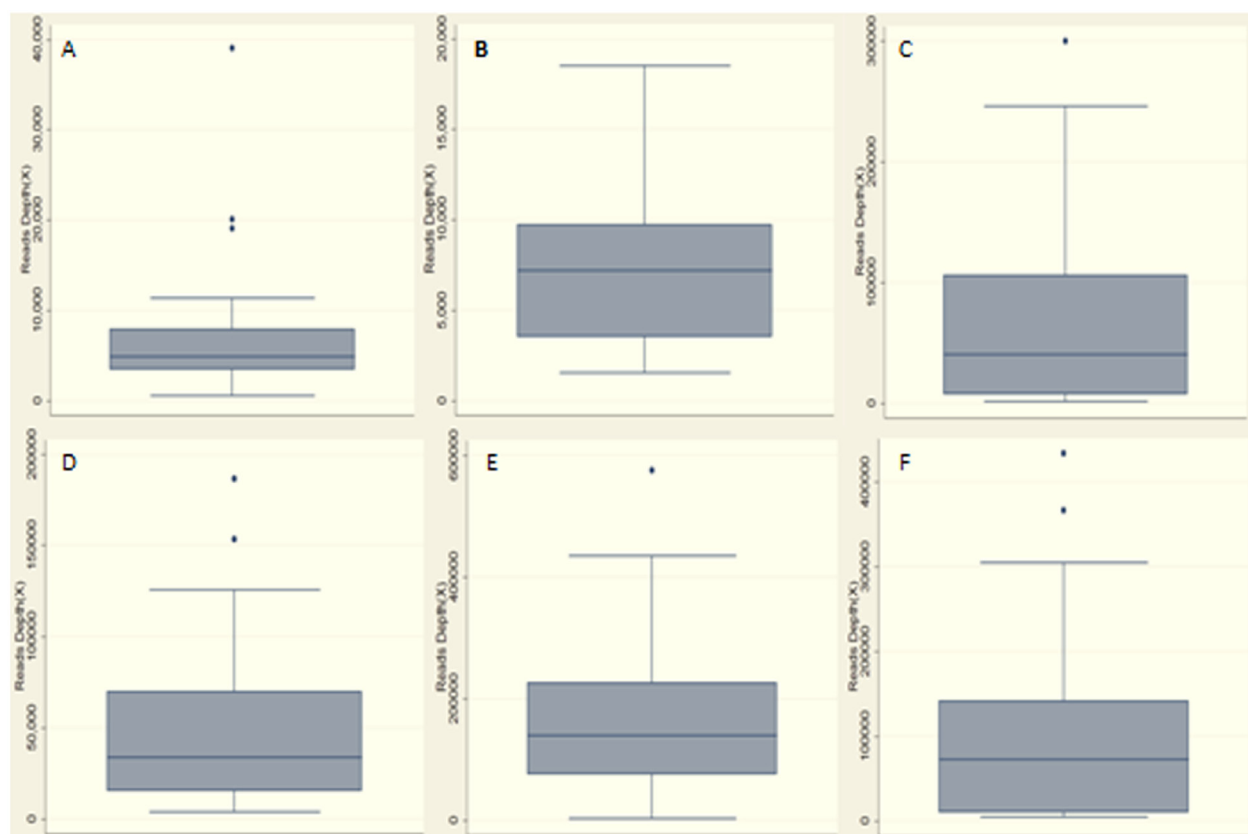

**Figure 1: Statistics of read depth for Miseq sequence in plasma and matched tumor DNA samples of the patients. A.** Read depth of *TERT* gene in tumor DNA samples; **B.** Read depth of *CTNNB1* gene in tumor DNA samples; **C.** Read depth of *TP53* gene in tumor DNA samples; median read depth in tumor samples was 7,194 $\times$  and the average was 27,410 $\times$ ; **D.** Read depth of *TERT* gene in plasma DNA samples; **E.** Read depth of *CTNNB1* gene in plasma DNA samples; **F.** Read depth of *TP53* gene in plasma DNA samples; median read depth in plasma samples was 72,184 $\times$  and the average was 106,000 $\times$ .

**Table 1: Correlation between tumor-associated mutations and clinicopathological parameters**

| Clinical Characteristic  | Patients (n=41)         |    | T-TERT<br>(N=29) | T-TP53<br>(N=27) | T-CTNNB1<br>(N=11) | Any T<br>(N=39) | P-TERT<br>(N=2) | P-TP53<br>(N=2) | P-CTNNB1<br>(N=4) | Any P<br>(N=8) |        |
|--------------------------|-------------------------|----|------------------|------------------|--------------------|-----------------|-----------------|-----------------|-------------------|----------------|--------|
|                          | No.                     | %  |                  |                  |                    |                 |                 |                 |                   |                |        |
| <b>Age:</b>              | ≤60                     | 25 | 61               | 19               | 15                 | 6               | 24              | 1               | 2                 | 2              | 5      |
|                          | >60                     | 16 | 39               | 10               | 12                 | 5               | 15              | 1               | 0                 | 2              | 3      |
|                          | P                       |    | -                | 0.698            | 0.657              | 0.739           | 0.959           | 1.000           | 0.522             | 1.000          | 1.000  |
| <b>Gender:</b>           | Female                  | 8  | 19.5             | 4                | 4                  | 2               | 7               | 1               | 0                 | 1              | 2      |
|                          | Male                    | 33 | 80.5             | 25               | 23                 | 9               | 32              | 1               | 2                 | 3              | 6      |
|                          | P                       |    | -                | 0.749            | 0.751              | 1.000           | 0.858           | 0.379           | 1.000             | 1.000          | 0.659  |
| <b>Alcohol:</b>          | Yes                     | 14 | 34.1             | 11               | 10                 | 4               | 13              | 0               | 2                 | 1              | 3      |
|                          | No                      | 27 | 65.9             | 18               | 17                 | 7               | 26              | 2               | 0                 | 3              | 5      |
|                          | P                       |    | -                | 0.745            | 0.807              | 1.000           | 0.939           | 1.000           | 0.133             | 1.000          | 1.000  |
| <b>Cirrhosis:</b>        | Yes                     | 24 | 58.5             | 14               | 16                 | 7               | 23              | 2               | 2                 | 2              | 6      |
|                          | No                      | 17 | 41.5             | 15               | 11                 | 4               | 16              | 0               | 0                 | 2              | 2      |
|                          | P                       |    | -                | 0.396            | 0.953              | 0.760           | 0.968           | 0.511           | 0.511             | 1.000          | 0.458  |
| <b>HBV:</b>              | Yes                     | 38 | 92.7%            | 28               | 25                 | 10              | 36              | 2               | 2                 | 3              | 7      |
|                          | No                      | 3  | 7.3%             | 1                | 2                  | 1               | 3               | 0               | 0                 | 1              | 1      |
|                          | P                       |    | -                | 0.637            | 1.000              | 1.000           | 1.000           | 1.000           | 1.000             | 0.320          | 0.522  |
| <b>Tumor size:</b>       | <5cm                    | 24 | 58.5             | 16               | 17                 | 7               | 23              | 1               | 1                 | 3              | 5      |
|                          | ≥5cm                    | 17 | 41.5             | 13               | 10                 | 4               | 16              | 1               | 1                 | 2              | 3      |
|                          | P                       |    | -                | 0.779            | 0.715              | 0.760           | 0.968           | 1.000           | 1.000             | 1.000          | 1.000  |
| <b>Vascular invasion</b> | Yes                     | 25 | 61               | 20               | 16                 | 4               | 24              | 2               | 2                 | 4              | 8      |
|                          | No                      | 16 | 39               | 9                | 11                 | 7               | 15              | 0               | 0                 | 0              | 0      |
|                          | P                       |    | -                | 0.492            | 0.887              | 0.182           | 0.959           | 0.522           | 0.522             | 0.281          | 0.041* |
| <b>Differentiation</b>   | Well                    | 9  | 21.9             | 3                | 2                  | 5               | 9               | 0               | 0                 | 2              | 2      |
|                          | Moderate                | 22 | 53.7             | 17               | 20                 | 4               | 21              | 1               | 2                 | 1              | 4      |
|                          | Poor                    | 10 | 24.4             | 9                | 5                  | 2               | 9               | 1               | 0                 | 1              | 2      |
|                          | P                       |    | -                | 0.482            | 0.191              | 0.333           | 0.987           | 1.000           | 1.000             | 0.533          | 1.000  |
| <b>Preoperative AFP</b>  | >20 ng ml <sup>-1</sup> | 26 | 63.4             | 20               | 17                 | 5               | 25              | 2               | 2                 | 2              | 6      |
|                          | ≤20 ng ml <sup>-1</sup> | 15 | 36.6             | 9                | 10                 | 6               | 14              | 0               | 0                 | 2              | 2      |
|                          | P                       |    | -                | 0.630            | 0.970              | 0.318           | 0.949           | 0.535           | 0.535             | 0.626          | 0.696  |
| <b>Tumor number</b>      | Single                  | 30 | 73.2             | 19               | 19                 | 8               | 28              | 1               | 1                 | 4              | 6      |
|                          | Multiple                | 11 | 26.8             | 10               | 8                  | 3               | 11              | 1               | 1                 | 0              | 2      |
|                          | P                       |    | -                | 0.491            | 0.801              | 1.000           | 0.890           | 0.485           | 0.485             | 0.558          | 1.000  |

Abbreviations: T-TERT, TERT mutation status in tumor tissue DNA; T-TP53, TP53 mutation status in tumor tissue DNA; T-CTNNB1, CTNNB1 mutation status in tumor tissue DNA; Any T, all of these mutations in tumor tissue DNA; P-TERT, TERT mutation status in Plasma DNA; P-TP53, TP53 mutation status in Plasma DNA; P-CTNNB1: CTNNB1 mutation status in Plasma DNA; Any P, all of these mutations in Plasma DNA

## DISCUSSION

The clinical value of using circulating cfDNA as a relatively noninvasive biomarker in cancer has been actively explored. However, we previously performed a meta-analysis to evaluate the use of traditional analyses of circulating cfDNA for HCC diagnosis and found that the results lacked robustness [15]. This is easy to understand because the number of circulating genic fragments that derive from tumor tissue is very small compared with the

number of total circulating DNA fragments (<1.0%) [16, 17] and therefore hard to detect by traditional technology.

Our current study used the MiSeq™ System to detect selected mutation fragments in ctDNA from the plasma of HCC patients for the first time, and demonstrated that this approach was suitable as a surrogate tissue for HCC patients.

The results of our study further suggested that mutation analysis of plasma DNA could predict a shorter recurrence-free survival time in HCC patients. In our

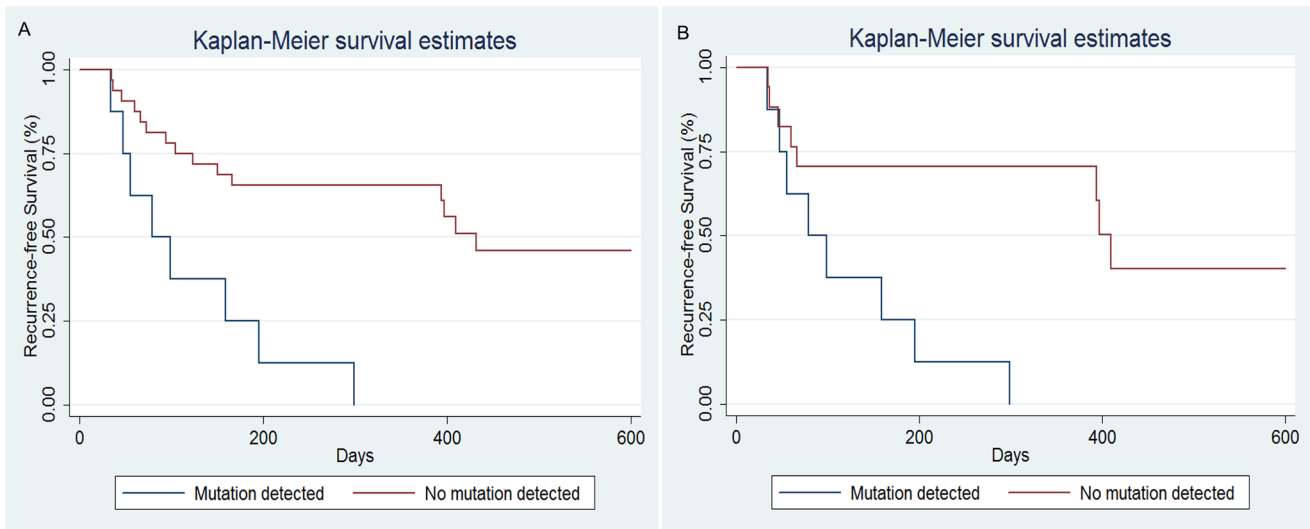

**Figure 2: Recurrence-free survival (RFS) curves for HCC patients included in our study.** A. Recurrence-free survival in subjects with detectable versus undetectable tumor-associated mutations in plasma DNA. This analyses revealed that patients with detectable tumor-associated somatic mutations in circulating cfDNA were more likely to relapse than those in whom the detection was negative ( $P < 0.001$ , log-rank test). B. Similar analyses were performed in patients who suffered vascular invasion, revealing a significant association between tumor-associated somatic mutation status and RFS ( $P = 0.003$ , log-rank test).

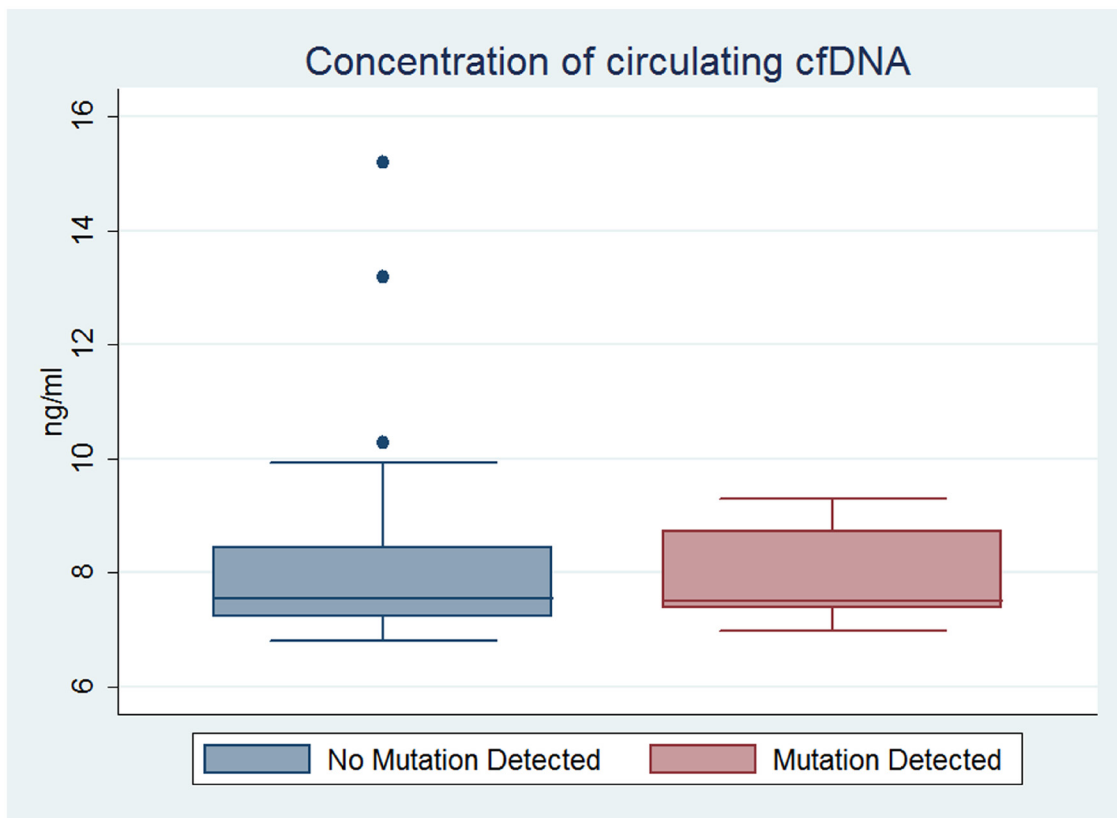

**Figure 3: Concentration of circulating cfDNA in subjects with detectable versus undetectable tumor-associated mutations in plasma DNA.** The median, 25th and 75th percentile, and upper and lower adjacent values of concentration of circulating cfDNA quantified by PicoGreen assay had been shown in box-and-whisker plots. There was no significant correlation between detectable somatic mutation status and the concentration of circulating cfDNA ( $P = 0.818$  by Wilcoxon rank sum test).

population, all of the patients with tumor-associated somatic mutation status in ctDNA suffered disease recurrence within 1 year, compared with only 31% of patients without corresponding mutation status. It appeared that the presence of tumor-associated mutations in plasma and disease recurrence had a close relationship, consistent with previous reports [16]. This result may be particularly useful for assessing prognosis and determining subsequent therapy.

In addition, we found that vascular invasion was an important factor influencing the ability to detect ctDNA carrying tumor-associated somatic mutations of HCC. This is easy to explain because vascular invasion will greatly increase the probability of the release of nucleic acid fragments into the circulation. In other words, detectable tumor-associated mutation status in ctDNA might indirectly imply that the patient suffered vascular invasion and might be the reason why “liquid biopsy” could predict the poor prognosis of HCC patients in our study. However, none of the other clinicopathologic characteristics of patients tested affected the probability of detecting ctDNA. Similarly, there was no significant correlation between detectable somatic mutation and the concentration of circulating cfDNA. This is probably because a higher percentage of nucleic acids might be released from non-mutation bearing tissues under various pathologic and normal physiologic statuses.

It is well recognized that most cancers are heterogeneous and that different areas of the same tumor can show different genetic profiles [18]. This might be the major limitation of traditional tissue biopsy [7, 17]. In our study, the fortuitous discovery of one patient in whom the tumor-associated mutation was detected in ctDNA but not in the tumor DNA provided powerful evidence that a “liquid biopsy” could overcome this kind of limitation.

Furthermore, we also showed that the tumor-associated mutations detected in ctDNA could use for HCC diagnosis. However, the sensitivity of this approach was not satisfactory, because these verified hotspots in the *TERT*, *CTNNB1*, and *TP53* genes were found in plasma DNA in only 3.9%, 7.8%, and 3.9% of our patients, respectively, even though careful measures were taken. However, if we combined these genes, the sensitivity could be improved 2- to 4-fold. Tracking multiple mutations might increase the robustness by compensating for effects of mutational drift or sampling noise. Thus, the greater number of mutation fragments in different genes used for detection in plasma, the better diagnostic performance would be got. In our study, the specificity for combined detection was as high as 90%.

Targeted sequencing for ctDNA has previously been applied in some types of tumor, such as pancreatic cancer with a sensitivity of 43% [19] and non-small cell lung cancer with a sensitivity of 34.3% [20]. These results were superior to those that we obtained for HCC. One possible explanation for this discrepancy might be ascribed to the

complex immunologic system of the liver. For example, among the innate immune components containing dozens of leukocytes and antigen-presenting cells [21, 22], Kupffer cells, which reside as stationary macrophages in the liver sinusoids, have been shown to perform functions of trapping, phagocytosing, and elimination [23] even for targets of circulating tumor cells and circulating DNAs [24, 25]. If the concentration of mutation fragments of ctDNA was far less than that of DNA derived from tissues without mutations, our evaluation of plasma DNA might miss such mutations [20]. Another possible explanation might be related to the targeted sequencing that we chose. The sequence changes that were chosen by Sausen et al. covered 116 specific genes in the targeted analyses [19], whereas Bai et al. analyzed *EGFR* mutations in exons 19 and 21 [20]. In our study, targeted sequencing only covered three different regions of the *hTERT*, *CTNNB1*, and *P53* genes with total coverage of 453bp. The small number of mutation fragments used for detection might contribute to the difference in results between our study and previous reports.

Of course, this research is just beginning. We are currently planning a prospective study with multiple targets covering almost all HCC-associated mutations to improve the value of the circulating cfDNA assay in HCC. Once validated in additional clinical trials, our approach would provide advantageous information for molecular assessment in personalized HCC management.

In conclusion, we present a framework for the use of circulating tumor DNA as a liquid biopsy for HCC patients for the first time. The results of our study provided strong evidence that the mutation fragments present in plasma were associated with vascular invasion and might be used for predicting a shorter recurrence-free survival time. We also confirmed that examination of ctDNA for genetic alterations could overcome the limitation of tumor heterogeneity. Moreover, the noninvasive detection of *TERT*, *CTNNB1* and *TP53* mutations by circulating cfDNA could be a reliable approach for HCC, and detection of multiple mutations in different genes would improve the diagnostic performance. Prospective validation based upon this initial study is now needed.

## MATERIALS AND METHODS

### Sample collection and DNA extraction

This study was approved by the Ethics Review committee of Peking Union Medical College. HCC patients were eligible if they agreed to undergo a circulating cfDNA assay on plasma obtained before surgery and provided signed informed consent. No more restriction was existed. The peripheral blood was drawn into EDTA tubes and within 1 hour subjected to centrifugation at 800g for 10 min. The plasma was

separated from blood cells and subjected to an additional centrifugation step at a high speed of 16,000g for 10 min to remove any remaining cellular debris [26]. The plasma supernatant and matched blood cells were stored separately at -80°C. Corresponding tumor samples, about 1 cm\*1 cm, were taken from the central part of the tumor tissue and frozen in liquid nitrogen immediately after surgery, and then were transferred to -80°C for storage. The necrotic tissue was also avoided when tissue samples were obtained. The pathologic diagnosis of tumor was based on histologic criteria [27].

DNA was extracted from frozen tissue and matched blood cells using the QIAamp DNA mini kit (Qiagen Co. Ltd, DE). Circulating cfDNA was extracted from 720µl of plasma per sample using the NucleoSpin Plasma XS

kit (Macherey & Nagel GmbH & Co. KG, DE) strictly following the manufacturer's instructions.

### Study design and MiSeq sequencing

Some hotspots in the *TERT*, *TP53*, and *CTNNB1* genes have emerged as the most prevalent sites of mutation in HCC patients, such as -124G>A in *TERT*, c.747G>T in *TP53* and c.134C>T in *CTNNB1*[13, 28]. In theory, these specific genetic aberrations would be present in ctDNA and shed into the bloodstream. This kind of actionable information could be exploited in a liquid biopsy for clinical and investigational applications (Figure 4). Therefore, we designed primers to amplify different regions containing frequent mutations of these three genes

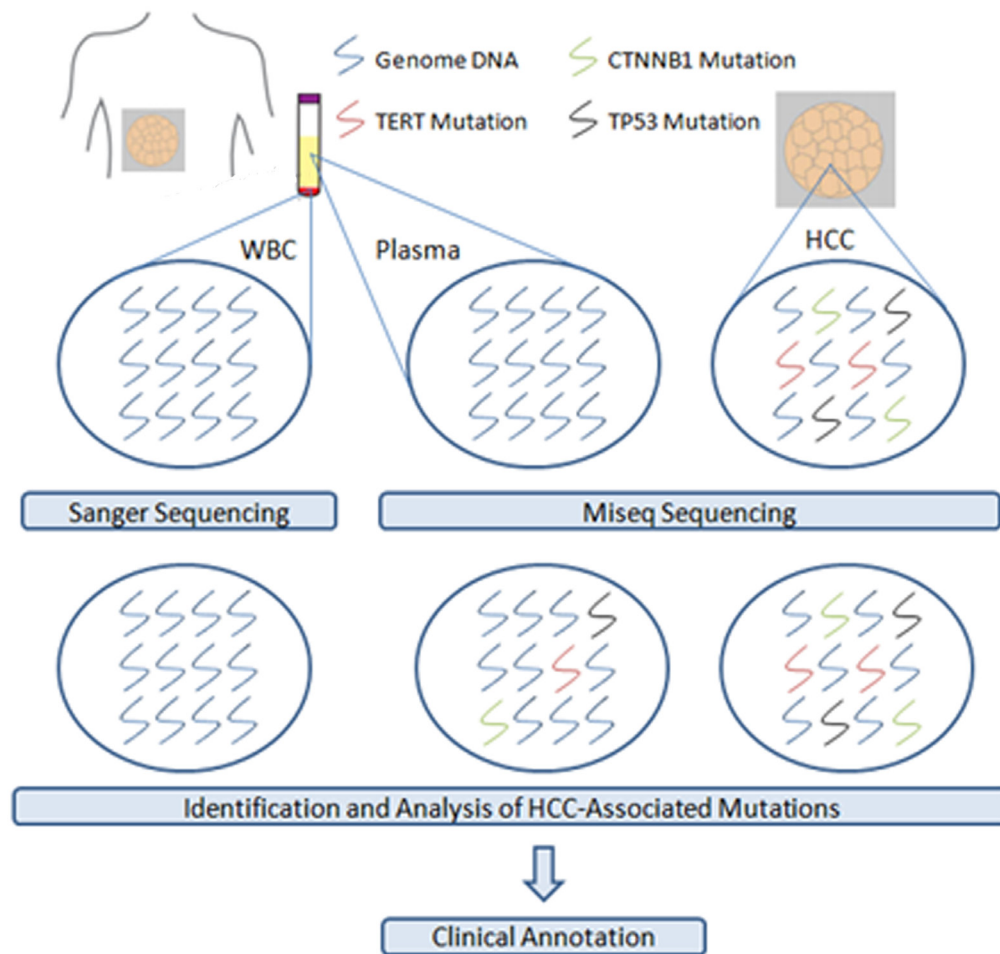

**Figure 4: Identification and analysis of HCC-associated mutations from plasma and tumor samples by MiSeq sequencing.** Overview of the study design: DNA samples were extracted from plasma, white blood cells (WBC) and matched tumor tissue from hepatocellular carcinoma (HCC) patients respectively. Using the MiSeq™ sequencing, plasma and matched tumor DNA samples were analyzed for hotspot mutations in the *TERT*, *CTNNB1*, and *TP53* genes that had been verified as the most prevalent mutations in HCC. These HCC-associated genetic mutations could be detected in ctDNA and this was evaluated for potential clinical utility or as prognostic indicators. Sanger sequencing was performed for genome DNA from white blood cells and used to verify these somatic genetic alterations that we selected for analysis were specific for HCC.

in tumor tissue and plasma (Supplementary Table 5). The following process was independently and participants were blinded to the samples and patient's clinical characteristics. All of the amplification products were less than 170bp in length. Each PCR reaction contained 0.3µl primer STAR GXL DNA polymerase (Takara Bio Company, Japan), 3 µl of 5×primer STAR GXL Buffer (Takara), 5 µM of each primer, 2.5 mM of dNTP mixture, 1.5 µl template DNA purified from tissue samples or 5 µl template DNA purified from plasma, and ddH<sub>2</sub>O to give a total volume of 15 µl. The PCR conditions were 95°C for 2 minutes; 35 cycles of 98°C for 30 seconds, 60°C for 30 seconds, and 68°C for 30 seconds; with a final incubation at 68°C for 5 minutes. The PCR products were initially identified by Sanger sequencing and sequenced using the MiSeq™ System (Illumina, Inc, US) with Miseq Reagent Kit V3 strictly according to the manufacturer's instructions.

The MiSeq™ System can perform base calling using integrated Real Time Analysis and produces information about alignment, structural variants, and contig assemblies for each sample. The raw data that were generated from containing base calls per cycle needed to be trimmed by the software Mothur [29] with the conditions of minimum Phred quality score of 20 and maximum homopolymer of 10. Furthermore, ambiguous bases and selfsame barcodes and primers were also abandoned. Finally, a total of 16,409,410 paired-end reads were retained for further processing. We used Burrows Wheeler Aligner's Smith-Waterman Alignment [30] to align all of these qualified sequencing reads to a reference genome (H19) and software of VarScan [31] to detect single nucleotide variants or indels with high sensitivity and specificity. We also used the ANNOVAR tool [32] to annotate genetic variations among these high-throughput sequencing data.

### Sanger sequencing

We used Sanger sequencing to verify the PCR products before MiSeq sequencing and to identify mutations in genomic DNA isolated from blood cells. The PCR products were sequenced using ABI 3730 (Applied Biosystems Inc, US). Mutation Surveyor Software [33] was used for mutational analysis.

### Quantification of circulating cfDNA from plasma

We quantified the amount of total circulating cfDNA using Quant-iT™ PicoGreen® dsDNA Kit (Thermo Fisher Scientific, US). This kind of ultrasensitive fluorescent nucleic acid stain is very sensitivity for DNA quantification. Each DNA sample was diluted with Tris-EDTA buffer (10 mM Tris-HCL, 1 mM EDTA, pH 7.5) to 100 µl in 96-well microplate, and then 100 µl of Quant-iT™ PicoGreen® reagent (200-fold dilution) was added to each cuvette with a final volume of 200 µl.

The mixed working solution was protected from light and incubated for 5 minutes at room temperature. After that, the fluorescent signal of each sample was measured at standard fluorescein wavelengths (excitation was 480 nm and emission was 520 nm) using Synergy H1 (Multi-Mode Reader, BioTek, US). All of samples were assessed in triplicate. Standard curve was generated using lambda DNA standard provided by this kit.

### Statistical analysis

We used Stata software (version 12.0; Stata Corporation LP; College Station, TX) to perform statistical analyses. The X<sup>2</sup>-test and Fisher's exact test was used to assess the relationship between genetic mutation status and each of the clinical and pathologic characteristics. Curves for recurrence-free survival (calculated as the time from operation to tumor recurrence) were constructed using the Kaplan–Meier method and assessed using the log-rank test. We also used the Wilcoxon rank sum test to determine whether the quantity of circulating cfDNA had a significant impact on mutation detection in ctDNA. For each analysis, a result was considered to be statistically significant if the P-value was less than 0.05.

### ACKNOWLEDGMENTS

We thank AUWIGENE Company for technical assistance with Miseq sequencing.

### CONFLICTS OF INTEREST

No conflict of interest exists in the submission of this manuscript. All authors have approved this manuscript and certified that the submission is original work and is not under consideration for publication elsewhere, in whole or in part.

### SUPPORTIVE FOUNDATIONS

This study was supported by the China Medical Board of New York (CMB) (11-045), the National Natural Science Foundation of China (81201566), National Key Technology Research and Development Program of China (2012BAI06B00).

### REFERENCES

1. Schwarzenbach H, Hoon DSB, Pantel K. Cell-free nucleic acids as biomarkers in cancer patients. *Nat Rev Cancer*. 2011; 11:426-437.
2. Jung K, Fleischhacker M, Rabien A. Cell-free DNA in the blood as a solid tumor biomarker-A critical appraisal of the literature. *Clin Chim Acta*. 2010; 411:1611-1624.



3. Ignatiadis M, Dawson SJ. Circulating tumor cells and circulating tumor DNA for precision medicine: dream or reality? *Ann Oncol.* 2014; 25:2304-2313.
4. Forshew T, Murtaza M, Parkinson C, Gale D, Tsui DWY, Kaper F, Dawson SJ, Piskorz AM, Jimenez-Linan M, Bentley D, Hadfield J, May AP, Caldas C, Brenton JD, Rosenfeld N. Noninvasive Identification and Monitoring of Cancer Mutations by Targeted Deep Sequencing of Plasma DNA. *Sci Transl Med.* 2012; 4.
5. Diehl F, Li M, Dressman D, He YP, Shen D, Szabo S, Diaz LA, Goodman SN, David KA, Juhl H, Kinzler KW, Vogelstein B. Detection and quantification of mutations in the plasma of patients with colorectal tumors. *P Natl Acad Sci USA.* 2005; 102:16368-16373.
6. Diaz LA, Jr., Bardelli A. Liquid biopsies: genotyping circulating tumor DNA. *Journal of clinical oncology.* 2014; 32:579-586.
7. Crowley E, Di Nicolantonio F, Loupakis F, Bardelli A. Liquid biopsy: monitoring cancer-genetics in the blood. *Nat Rev Clin Oncol.* 2013; 10:472-484.
8. Chan KCA, Jiang PY, Zheng YWL, Liao GJW, Sun H, Wong J, Siu SSN, Chan WC, Chan SL, Chan ATC, Lai PBS, Chiu RWK, Lo YMD. Cancer Genome Scanning in Plasma: Detection of Tumor-Associated Copy Number Aberrations, Single-Nucleotide Variants, and Tumoral Heterogeneity by Massively Parallel Sequencing. *Clin Chem.* 2013; 59:211-224.
9. Oxnard GR, Paweletz CP, Kuang Y, Mach SL, O'Connell A, Messineo MM, Luke JJ, Butaney M, Kirschmeier P, Jackman DM, Janne PA. Noninvasive detection of response and resistance in EGFR-mutant lung cancer using quantitative next-generation genotyping of cell-free plasma DNA. *Clinical cancer research.* 2014; 20:1698-1705.
10. Dawson SJ, Tsui DWY, Murtaza M, Biggs H, Rueda OM, Chin SF, Dunning MJ, Gale D, Forshew T, Mahler-Araujo B, Rajan S, Humphray S, Becq J, Halsall D, Wallis M, Bentley D, et al. Analysis of Circulating Tumor DNA to Monitor Metastatic Breast Cancer. *New Engl J Med.* 2013; 368:1199-1209.
11. Mittal S, El-Serag HB. Epidemiology of Hepatocellular Carcinoma Consider the Population. *J Clin Gastroenterol.* 2013; 47:S2-S6.
12. Villanueva A, Llovet JM. LIVER CANCER IN 2013 Mutational landscape of HCC-the end of the beginning. *Nat Rev Clin Oncol.* 2014; 11:73-74.
13. Nault JC, Mallet M, Pilati C, Calderaro J, Bioulac-Sage P, Laurent C, Laurent A, Cherqui D, Balabaud C, Zucman-Rossi J. High frequency of telomerase reverse-transcriptase promoter somatic mutations in hepatocellular carcinoma and preneoplastic lesions (vol 4, 2218, 2013). *Nat Commun.* 2013; 4.
14. Zhan P, Ji YN, Yu LK. TP53 mutation is associated with a poor outcome for patients with hepatocellular carcinoma: evidence from a meta-analysis. *Hepatobiliary Surg Nutr.* 2013; 2:260-265.
15. Liao WJ, Mao YL, Ge PL, Yang HY, Xu HF, Lu X, Sang XT, Zhong SX. Value of Quantitative and Qualitative Analyses of Circulating Cell-Free DNA as Diagnostic Tools for Hepatocellular Carcinoma A Meta-Analysis. *Medicine.* 2015; 94.
16. Diehl F, Schmidt K, Choti MA, Romans K, Goodman S, Li M, Thornton K, Agrawal N, Sokoll L, Szabo SA, Kinzler KW, Vogelstein B, Diaz LA. Circulating mutant DNA to assess tumor dynamics. *Nat Med.* 2008; 14:985-990.
17. Diaz LA, Bardelli A. Liquid Biopsies: Genotyping Circulating Tumor DNA. *J Clin Oncol.* 2014; 32:579-+.
18. Zhang J, Fujimoto J, Zhang J, Wedge DC, Song X, Zhang J, Seth S, Chow CW, Cao Y, Gumbs C, Gold KA, Kalhor N, Little L, Mahadeshwar H, Moran C, Protopopov A, et al. Intratumor heterogeneity in localized lung adenocarcinomas delineated by multiregion sequencing. *Science.* 2014; 346:256-259.
19. Sausen M, Phallen J, Adleff V, Jones S, Leary RJ, Barrett MT, Anagnostou V, Parpart-Li S, Murphy D, Kay Li Q, Hruban CA, Scharpf R, White JR, O'Dwyer PJ, Allen PJ, Eshleman JR, et al. Clinical implications of genomic alterations in the tumour and circulation of pancreatic cancer patients. *Nat Commun.* 2015; 6:7686.
20. Bai H, Mao L, Wang HS, Zhao J, Yang L, An TT, Wang X, Duan CJ, Wu NM, Guo ZQ, Liu YX, Liu HN, Wang YY, Wang J. Epidermal Growth Factor Receptor Mutations in Plasma DNA Samples Predict Tumor Response in Chinese Patients With Stages IIIB to IV Non-Small-Cell Lung Cancer. *J Clin Oncol.* 2009; 27:2653-2659.
21. Seki S, Nakashima H, Nakashima M, Kinoshita M. Antitumor immunity produced by the liver Kupffer cells, NK cells, NKT cells, and CD8 CD122 T cells. *Clin Dev Immunol.* 2011; 2011:868345.
22. Doherty DG. Immunity, tolerance and autoimmunity in the liver: A comprehensive review. *J Autoimmun.* 2016; 66:60-75. doi: 10.1016/j.jaut.2015.08.020.
23. Wong CH, Jenne CN, Petri B, Chrobok NL, Kubes P. Nucleation of platelets with blood-borne pathogens on Kupffer cells precedes other innate immunity and contributes to bacterial clearance. *Nat Immunol.* 2013; 14:785-792.
24. Gul N, Babes L, Siegmund K, Korthouwer R, Bogels M, Braster R, Vidarsson G, ten Hagen TL, Kubes P, van Egmond M. Macrophages eliminate circulating tumor cells after monoclonal antibody therapy. *J Clin Invest.* 2014; 124:812-823.
25. Emlen W, Mannik M. Kinetics and Mechanisms for Removal of Circulating Single-Stranded-DNA in Mice. *J Exp Med.* 1978; 147:684-699.

26. Swinkels DW, Wiegerinck E, Steegers EAP, de Kok JB. Effects of blood-processing protocols on cell-free DNA quantification in plasma. *Clin Chem*. 2003; 49:525-526.
27. Kojiro M, Wanless IR, Alves V, Badve S, Bala-Baud C, Bedosa P, Bhathal P, Bioulac-Sage P, Brunt EM, Burt AD, Craig JR, Dhillon A, Ferrell L, Geller SA, Goodman ZD, Gouw ASH, et al. Pathologic Diagnosis of Early Hepatocellular Carcinoma: A Report of the International Consensus Group for Hepatocellular Neoplasia. *Hepatology*. 2009; 49:658-664.
28. Guichard C, Amaddeo G, Imbeaud S, Ladeiro Y, Pelletier L, Ben Maad I, Calderaro J, Bioulac-Sage P, Letexier M, Degos F, Clement B, Balabaud C, Chevet E, Laurent A, Couchy G, Letouze E, et al. Integrated analysis of somatic mutations and focal copy-number changes identifies key genes and pathways in hepatocellular carcinoma. *Nat Genet*. 2012; 44:694-U120.
29. Schloss PD. A high-throughput DNA sequence aligner for microbial ecology studies. *PLoS One*. 2009; 4:e8230.
30. Li H, Durbin R. Fast and accurate long-read alignment with Burrows-Wheeler transform. *Bioinformatics*. 2010; 26:589-595.
31. Koboldt DC, Chen K, Wylie T, Larson DE, McLellan MD, Mardis ER, Weinstock GM, Wilson RK, Ding L. VarScan: variant detection in massively parallel sequencing of individual and pooled samples. *Bioinformatics*. 2009; 25:2283-2285.
32. Wang K, Li M, Hakonarson H. ANNOVAR: functional annotation of genetic variants from high-throughput sequencing data. *Nucleic Acids Res*. 2010; 38:e164.
33. Minton JA, Flanagan SE, Ellard S. Mutation surveyor: software for DNA sequence analysis. *Methods Mol Biol*. 2011; 688:143-153.
