# Supplementary material for: Noninvasive detection of tumor-associated mutations from circulating cell-free DNA in hepatocellular carcinoma patients by targeted deep sequencing
Source: PubMed Central journal article supplement (PMC5130021; doi:10.18632/oncotarget.9629), 2016-05-26
Supplement: oncotarget-07-40481-s001.pdf [file oncotarget-07-40481-s001.pdf]

## **Noninvasive detection of tumor-associated mutations from circulating cell-free DNA in hepatocellular carcinoma patients by targeted deep sequencing**

### **SUPPLEMENTARY TABLES**

**Supplementary Table S1: Detailed information of the prior-treatment status of HCC patients**

See Supplementary File 1

Supplementary Table S2: Clinical characteristics and mutation status in plasma DNA of control group

| Subjects | Age (Year) | Sex | Alcohol intake | Cirrhosis | HBV | Diagnosis           | Mutation           |              |                      |
|----------|------------|-----|----------------|-----------|-----|---------------------|--------------------|--------------|----------------------|
|          |            |     |                |           |     |                     | P-TERT             | P-CTNNB1     | P-TP53               |
| Con1     | 37         | F   | No             | No        | No  | Hepatic hemangiomas | -135G>T            | Not detected | Not detected         |
| Con2     | 50         | M   | Yes            | No        | No  | hepatic hemangiomas | Not detected       | Not detected | Not detected         |
| Con3     | 36         | F   | No             | No        | No  | Hepatic EHE         | Not detected       | c.90C>T      | Not detected         |
| Con4     | 65         | M   | Yes            | No        | No  | FNH                 | -166C>T            | 131C>T       | Not detected         |
| Con5     | 33         | M   | Yes            | No        | No  | HCE                 | Not detected       | 120T>C       | Not detected         |
| Con6     | 70         | M   | No             | No        | No  | ICC                 | -189A>G<br>-166C>T | Not detected | Not detected         |
| Con7     | 25         | F   | No             | No        | No  | HC                  | -189A>G<br>-124C>T | Not detected | c.730G>T<br>c.729G>A |
| Con8     | 35         | F   | No             | No        | No  | HC                  | Not detected       | Not detected | Not detected         |
| Con9     | 25         | F   | No             | No        | No  | HC                  | Not detected       | Not detected | Not detected         |
| Con10    | 23         | F   | No             | No        | No  | HC                  | Not detected       | Not detected | Not detected         |

Abbreviations: F, Female; M, Male; Con, Control group; Hepatic EHE, Hepatic epithelioid hemangioendothelioma; FNH, Focal nodular hyperplasia; HCE, Hepatic cystic echinococcosis; ICC, Intrahepatic cholangiocellular carcinomas; HC, Health control.

**Supplementary Table S3: Variants in TERT, CTNNB1 and TP53 detected in tumor tissue and plasma of HCC patients**

See Supplementary File 2

Supplementary Table S4: Repeated trials in five randomly selected patients

| Subject | Mutations |              |              | Mutations (repeated trials)              |              |              |
|---------|-----------|--------------|--------------|------------------------------------------|--------------|--------------|
|         | P-TERT    | P-CTNNB1     | P-TP53       | P-TERT                                   | P-CTNNB1     | P-TP53       |
| HCC06   | -168A>C   | Not detected | Not detected | Not detected                             | Not detected | Not detected |
| HCC07   | -166C>T   | Not detected | Not detected | -113C>T<br>-104T>C                       | Not detected | c.737T>C     |
| HCC09   | -189A>G   | Not detected | Not detected | -189A>T<br>-113C>T<br>-104T>C<br>-98T>C  | Not detected | c.737T>C     |
| HCC16   | -168A>G   | c.116C>T     | Not detected | -168A>G                                  | Not detected | Not detected |
| HCC38   | -124C>T   | Not detected | c.737T>A     | -189A>T<br>-124C>T<br>-113C>T<br>-104T>C | Not detected | c.737T>A     |

Abbreviations: Reads Depth in repeated trials had been increased (Median: 92461X; Average: 156810X).

**Supplementary Table S5: Primer design for MiSeq sequencing**

See Supplementary File 3
